# Supplementary material for: Assessment of Neonatal Intensive Care Unit Practices, Morbidity, and Mortality Among Very Preterm Infants in China
Source: PubMed Central journal article supplement (PMC8329742; doi:10.1001/jamanetworkopen.2021.18904), 2021-08-02
Supplement: jamanetwopen-e2118904-s001.pdf [file jamanetwopen-e2118904-s001.pdf]

## Supplementary Online Content

Cao Y, Jiang S, Sun J, et al. Assessment of neonatal intensive care unit practices, morbidity, and mortality among very preterm infants in China. *JAMA Netw Open*. 2021;4(8):e2118904. doi:10.1001/jamanetworkopen.2021.18904

**eFigure.** Map of 58 Participating Hospitals in Chinese Neonatal Network

**eTable 1.** Morbidities of Very Preterm Infants (<32 Weeks' Gestation) Admitted to 57 Chinese NICUs and Discharged Against Medical Advice

**eTable 2.** Morbidities of All Very Preterm Infants (<32 Weeks' Gestation) Admitted to 57 Chinese NICUs

**eTable 3.** Survival to Discharge for All Very Preterm Infants (<32 Weeks' Gestation) Admitted to 57 Chinese NICUs

This supplementary material has been provided by the authors to give readers additional information about their work.

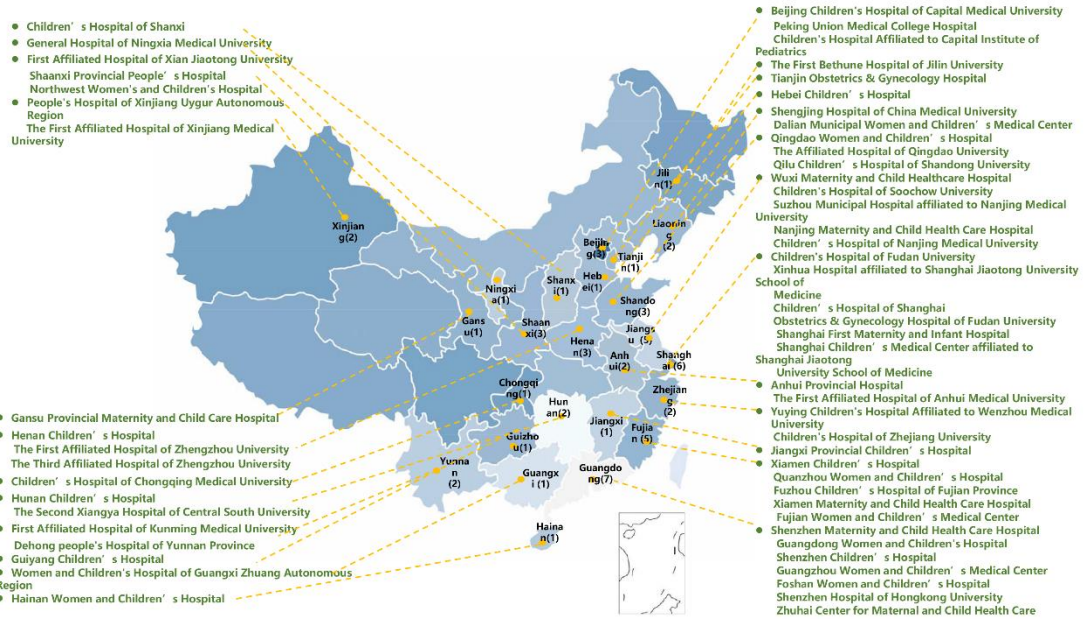

**Figure.** Map of 58 participating hospitals in Chinese Neonatal Network

**eTable 1.** Morbidities of very preterm infants (<32<sup>+0</sup> weeks' gestation) admitted to 57 Chinese NICUs and discharged against medical advice

|                                        | Total                | ≤23 weeks       | 24 weeks          | 25 weeks         | 26 weeks           | 27 weeks           | 28 weeks           | 29 weeks           | 30 weeks           | 31 weeks           |
|----------------------------------------|----------------------|-----------------|-------------------|------------------|--------------------|--------------------|--------------------|--------------------|--------------------|--------------------|
|                                        | N=1381               | N=9             | N=40              | N=68             | N=126              | N=179              | N=239              | N=213              | N=252              | N=255              |
| IVH≥grade 3 or cystic PVL <sup>a</sup> | 193/840<br>(23.0%)   | 2/4<br>(50.0%)  | 10/24<br>(41.7%)  | 9/33<br>(27.3%)  | 32/72<br>(44.4%)   | 30/108<br>(27.8%)  | 32/138<br>(23.2%)  | 27/136<br>(19.9%)  | 28/160<br>(17.5%)  | 23/165<br>(13.9%)  |
| BPD <sup>b</sup>                       | 1026/1375<br>(74.6%) | 9/9<br>(100.0%) | 40/40<br>(100.0%) | 65/68<br>(95.6%) | 119/125<br>(95.2%) | 160/179<br>(89.4%) | 192/237<br>(81.0%) | 147/212<br>(69.3%) | 163/251<br>(64.9%) | 131/254<br>(51.6%) |
| NEC≥stage 2                            | 93/1381<br>(6.7%)    | 0/9 (0.0%)      | 1/40<br>(2.5%)    | 6/68 (8.8%)      | 2/126<br>(1.6%)    | 14/179<br>(7.8%)   | 15/239<br>(6.3%)   | 17/213<br>(8.0%)   | 26/252<br>(10.3%)  | 12/255<br>(4.7%)   |
| Sepsis                                 | 107/1381<br>(7.7%)   | 0/9 (0.0%)      | 4/40<br>(10.0%)   | 7/68<br>(10.3%)  | 12/126<br>(9.5%)   | 22/179<br>(12.3%)  | 17/239<br>(7.1%)   | 20/213<br>(9.4%)   | 16/252<br>(6.3%)   | 9/255<br>(3.5%)    |
| ROP≥stage 3 <sup>c</sup>               | 22/500<br>(4.4%)     | N/A             | 0/5 (0.0%)        | 0/6 (0.0%)       | 5/29<br>(17.2%)    | 4/59 (6.8%)        | 5/84 (6.0%)        | 2/85 (2.4%)        | 3/117<br>(2.6%)    | 3/115<br>(2.6%)    |

<sup>a</sup> IVH and PVL was evaluated among infants with neuroimaging results.

<sup>b</sup> BPD was defined as ventilation or oxygen dependency at 36 weeks' postmenstrual age or at discharge/transfer/death if before 36 weeks. Respiratory support on 6 infants were not available.

<sup>c</sup> ROP was evaluated among infants with eye examinations.

Abbreviations: NICU, neonatal intensive care unit; IVH, intraventricular hemorrhage; PVL, periventricular leukomalacia; BPD, bronchopulmonary dysplasia; NEC, necrotizing enterocolitis; ROP, retinopathy of prematurity

**eTable 2.** Morbidities of all very preterm infants (<32 weeks' gestation) admitted to 57 Chinese NICUs

|                                        | Total                | ≤23 weeks        | 24 weeks         | 25 weeks           | 26 weeks           | 27 weeks           | 28 weeks            | 29 weeks            | 30 weeks            | 31 weeks            |
|----------------------------------------|----------------------|------------------|------------------|--------------------|--------------------|--------------------|---------------------|---------------------|---------------------|---------------------|
|                                        | N=9552               | N=32             | N=92             | N=229              | N=451              | N=842              | N=1424              | N=1783              | N=2169              | N=2530              |
| IVH≥grade 3 or cystic PVL <sup>a</sup> | 938/8029<br>(11.7%)  | 6/15<br>(40.0%)  | 19/62<br>(30.6%) | 44/163<br>(27.0%)  | 85/358<br>(23.7%)  | 122/680<br>(17.9%) | 161/1197<br>(13.5%) | 171/1548<br>(11.0%) | 180/1848<br>(9.7%)  | 150/2158<br>(7.0%)  |
| BPD <sup>b</sup>                       | 3405/9523<br>(35.8%) | 30/32<br>(93.8%) | 82/92<br>(89.1%) | 175/226<br>(77.4%) | 323/450<br>(71.8%) | 469/842<br>(55.7%) | 651/1416<br>(46.0%) | 606/1780<br>(34.0%) | 574/2166<br>(26.5%) | 495/2519<br>(19.7%) |
| NEC≥stage 2                            | 496/9552<br>(5.2%)   | 0/32<br>(0%)     | 5/92<br>(5.4%)   | 23/229<br>(10.0%)  | 21/451<br>(4.7%)   | 60/842<br>(7.1%)   | 82/1424<br>(5.8%)   | 88/1783<br>(4.9%)   | 121/2169<br>(5.6%)  | 96/2530<br>(3.8%)   |
| Sepsis                                 | 871/9552<br>(9.1%)   | 4/32<br>(12.5%)  | 11/92<br>(12.0%) | 38/229<br>(16.6%)  | 58/451<br>(12.9%)  | 104/842<br>(12.4%) | 169/1424<br>(11.9%) | 188/1783<br>(10.5%) | 152/2169<br>(7.0%)  | 147/2530<br>(5.8%)  |
| ROP≥stage 3 <sup>c</sup>               | 318/7351<br>(4.3%)   | 2/4<br>(50.0%)   | 11/33<br>(33.3%) | 31/124<br>(25.0%)  | 50/311<br>(16.1%)  | 49/634<br>(7.7%)   | 66/1128<br>(5.9%)   | 41/1495<br>(2.7%)   | 39/1740<br>(2.2%)   | 29/1882<br>(1.5%)   |

<sup>a</sup> IVH and PVL was evaluated among infants with neuroimaging results.

<sup>b</sup> BPD was defined as ventilation or oxygen dependency at 36 weeks' postmenstrual age or at discharge/transfer/death if before 36 weeks. Respiratory support on 29 infants were not available.

<sup>c</sup> ROP was evaluated among infants with eye examinations.

Abbreviations: NICU, neonatal intensive care unit; IVH, intraventricular hemorrhage; PVL, periventricular leukomalacia; BPD, bronchopulmonary dysplasia; NEC, necrotizing enterocolitis; ROP, retinopathy of prematurity

**eTable 3.** Survival to discharge for all very preterm infants (<32 weeks' gestation) admitted to 57 Chinese NICUs

|                                  | Total           | ≤23 weeks | 24 weeks      | 25 weeks       | 26 weeks       | 27 weeks       | 28 weeks        | 29 weeks        | 30 weeks        | 31 weeks        |
|----------------------------------|-----------------|-----------|---------------|----------------|----------------|----------------|-----------------|-----------------|-----------------|-----------------|
|                                  | N=9552          | N=32      | N=92          | N=229          | N=451          | N=842          | N=1424          | N=1783          | N=2169          | N=2530          |
| Survival                         | 8370<br>(87.6%) | 5 (15.6%) | 31<br>(33.7%) | 125<br>(54.6%) | 312<br>(69.2%) | 642<br>(76.2%) | 1206<br>(84.7%) | 1622<br>(91.0%) | 2024<br>(93.3%) | 2403<br>(95.0%) |
| Survival without major morbidity | 4947<br>(51.8%) | 0 (0.0%)  | 4 (4.3%)      | 22 (9.6%)      | 84<br>(18.6%)  | 268<br>(31.8%) | 567<br>(39.8%)  | 927<br>(52.0%)  | 1316<br>(60.7%) | 1759<br>(69.5%) |
