# Supplementary material for: Assessment of Neonatal Intensive Care Unit Practices, Morbidity, and Mortality Among Very Preterm Infants in China
Source: PubMed Central journal article supplement (PMC8329742; doi:10.1001/jamanetworkopen.2021.18904), 2021-08-02
Supplement: jamanetwopen-e2118904-s002.pdf [file jamanetwopen-e2118904-s002.pdf]

\*Indicates required information. Only first name, last name, and suffix will appear in PubMed.

| <b>*Group Name(s): The Chinese Neonatal Network</b> |                   |                              |                  |                                                                                              |                                          |                                                         |                                                                                            |  |
|-----------------------------------------------------|-------------------|------------------------------|------------------|----------------------------------------------------------------------------------------------|------------------------------------------|---------------------------------------------------------|--------------------------------------------------------------------------------------------|--|
| <b>*First Name and Middle Initial(s)</b>            | <b>*Last Name</b> | <b>*Suffix (eg, Jr, III)</b> | Academic Degrees | Institution                                                                                  | Location (city, state/province, country) | Role or Contribution, eg, chair, principal investigator | Group (if more than 1 Group listed in the byline) and/or Subgroup (eg, Steering Committee) |  |
| Falin                                               | Xu                |                              | MD               | The Third Affiliated Hospital of Zhengzhou University                                        | Zhengzhou, Henan, China                  | Site investigators                                      |                                                                                            |  |
| Xiuying                                             | Tian              |                              | MD               | Tianjin Obstetrics & Gynecology Hospital                                                     | Tianjin, Tianjin, China                  | Site investigators                                      |                                                                                            |  |
| Yong                                                | Ji                |                              | MD               | Children's Hospital of Shanxi                                                                | Taiyuan, Shanxi, China                   | Site investigators                                      |                                                                                            |  |
| Zhankui                                             | Li                |                              | MD               | Northwest Women's and Children's Hospital                                                    | Xi'an, Shaanxi, China                    | Site investigators                                      |                                                                                            |  |
| Jingyun                                             | Shi               |                              | MD               | Gansu Provincial Maternity and Child Care Hospital                                           | Lanzhou, Gansu, China                    | Site investigators                                      |                                                                                            |  |
| Xindong                                             | Xue               |                              | MD               | Shengjing Hospital of China Medical University                                               | Shenyang, Liaoning, China                | Site investigators                                      |                                                                                            |  |
| Chuanzhong                                          | Yang              |                              | MD               | Shenzhen Maternity and Child Health Care Hospital                                            | Shenzhen, Guangdong, China               | Site investigators                                      |                                                                                            |  |
| Dongmei                                             | Chen              |                              | MD               | Quanzhou Women and Children's Hospital                                                       | Quanzhou, Fujian, China                  | Site investigators                                      |                                                                                            |  |
| Sannan                                              | Wang              |                              | MD               | Suzhou Municipal Hospital affiliated to Nanjing Medical University                           | Suzhou, Jiangsu, China                   | Site investigators                                      |                                                                                            |  |
| Ling                                                | Liu               |                              | MD               | Guizhou Women and Children's Hospital/Guiyang Children's Hospital                            | Guiyang, Guizhou, China                  | Site investigators                                      |                                                                                            |  |
| Xirong                                              | Gao               |                              | MD               | Hunan Children's Hospital                                                                    | Changsha, Hunan, China                   | Site investigators                                      |                                                                                            |  |
| Changyi                                             | Yang              |                              | MD               | Fujian Maternity and Child Health Hospital, Affiliated Hospital of Fujian Medical University | Fuzhou, Fujian, China                    | Site investigators                                      |                                                                                            |  |
| Shuping                                             | Han               |                              | MD               | Nanjing Maternity and Child Health Care Hospital                                             | Nanjing, Jiangsu, China                  | Site investigators                                      |                                                                                            |  |
| Ruobing                                             | Shan              |                              | MD               | Qingdao Women and Children's Hospital                                                        | Qingdao, Shandong, China                 | Site investigators                                      |                                                                                            |  |
| Hong                                                | Jiang             |                              | MD               | The Affiliated Hospital of Qingdao University                                                | Qingdao, Shandong, China                 | Site investigators                                      |                                                                                            |  |
| Gang                                                | Qiu               |                              | MD               | Children's Hospital of Shanghai                                                              | Shanghai, Shanghai, China                | Site investigators                                      |                                                                                            |  |
| Qiufen                                              | Wei               |                              | MD               | Women and Children's Hospital of Guangxi Zhuang Autonomous Region                            | Xining, Guangxi, China                   | Site investigators                                      |                                                                                            |  |
| Rui                                                 | Cheng             |                              | MD               | Children's Hospital of Nanjing Medical University                                            | Nanjing, Jiangsu, China                  | Site investigators                                      |                                                                                            |  |
| Wenqing                                             | Kang              |                              | MD               | Henan Children's Hospital                                                                    | Zhengzhou, Henan, China                  | Site investigators                                      |                                                                                            |  |
| Mingxia                                             | Li                |                              | MD               | The First Affiliated Hospital of Xinjiang Medical University                                 | Urumqi, Xinjiang, China                  | Site investigators                                      |                                                                                            |  |
| Yiheng                                              | Dai               |                              | MD               | Foshan Women and Children's Hospital                                                         | Foshan, Guangdong, China                 | Site investigators                                      |                                                                                            |  |
| Lili                                                | Wang              |                              | MD               | The First Affiliated Hospital of Anhui Medical University                                    | Hefei, Anhui, China                      | Site investigators                                      |                                                                                            |  |
| Jiangqin                                            | Liu               |                              | MD               | Shanghai First Maternity and Infant Hospital                                                 | Shanghai, Shanghai, China                | Site investigators                                      |                                                                                            |  |
| Zhenlang                                            | Lin               |                              | MD               | Yuying Children's Hospital Affiliated to Wenzhou Medical University                          | Wenzhou, Zhejiang, China                 | Site investigators                                      |                                                                                            |  |

## Supplemental Online Content: Nonauthor Collaborators

\*Indicates required information. Only first name, last name, and suffix will appear in PubMed.

| *First Name and Middle Initial(s) | *Last Name | *Suffix (eg, Jr, III) | Academic Degrees | Institution                                                                                                                  | Location (city, state/province, country) | Role or Contribution, eg, chair, principal investigator | Group (if more than 1 Group listed in the byline) and/or Subgroup (eg, Steering Committee) |
|-----------------------------------|------------|-----------------------|------------------|------------------------------------------------------------------------------------------------------------------------------|------------------------------------------|---------------------------------------------------------|--------------------------------------------------------------------------------------------|
| Xiuyong                           | Cheng      |                       | MD               | The First Affiliated Hospital of Zhengzhou University                                                                        | Zhengzhou, Henan, China                  | Site investigators                                      |                                                                                            |
| Jiahua                            | Pan        |                       | MD               | The First Affiliated Hospital of USTC, Division of Life Sciences and Medicine, University of Science and Technology of China | Hefei, Anhui, China                      | Site investigators                                      |                                                                                            |
| Qin                               | Zhang      |                       | MD               | Shaanxi Provincial People's Hospital                                                                                         | Xi'an, Shaanxi, China                    | Site investigators                                      |                                                                                            |
| Xing                              | Feng       |                       | MD               | Children's Hospital of Soochow University                                                                                    | Suzhou, Jiangsu, China                   | Site investigators                                      |                                                                                            |
| Qin                               | Zhou       |                       | MD               | Wuxi Maternity and Child Healthcare Hospital                                                                                 | Wuxi, Jiangsu, China                     | Site investigators                                      |                                                                                            |
| Long                              | Li         |                       | MD               | People's Hospital of Xinjiang Uygur Autonomous Region                                                                        | Urumqi, Xinjiang, China                  | Site investigators                                      |                                                                                            |
| Pingyang                          | Chen       |                       | MD               | The Second Xiangya Hospital of Central South University                                                                      | Changsha, Hunan, China                   | Site investigators                                      |                                                                                            |
| Ling                              | Yang       |                       | MD               | Hainan Women and Children's Hospital                                                                                         | Haikou, Hainan, China                    | Site investigators                                      |                                                                                            |
| Deyi                              | Zhuang     |                       | MD               | Xiamen Children's Hospital                                                                                                   | Xiamen, Fujian, China                    | Site investigators                                      |                                                                                            |
| Yongjun                           | Zhang      |                       | MD               | Xinhua Hospital affiliated to Shanghai Jiao Tong University School of Medicine                                               | Shanghai, Shanghai, China                | Site investigators                                      |                                                                                            |
| Jinxing                           | Feng       |                       | MD               | Shenzhen Children's Hospital                                                                                                 | Shenzhen, Guangdong, China               | Site investigators                                      |                                                                                            |
| Li                                | Li         |                       | MD               | Children's Hospital Affiliated to Capital Institute of Pediatrics                                                            | Beijing, Beijing, China                  | Site investigators                                      |                                                                                            |
| Xinzhu                            | Lin        |                       | MD               | Women and Children's Hospital, School of Medicine, Xiamen university                                                         | Xiamen, Fujian, China                    | Site investigators                                      |                                                                                            |
| Yinping                           | Qiu        |                       | MD               | General Hospital of Ningxia Medical University                                                                               | Yinchuan, Ningxia, China                 | Site investigators                                      |                                                                                            |
| Kun                               | Liang      |                       | MD               | First Affiliated Hospital of Kunming Medical University                                                                      | Kunming, Yunnan, China                   | Site investigators                                      |                                                                                            |
| Li                                | Ma         |                       | MD               | Hebei Provincial Children's Hospital                                                                                         | Shijiazhuang, Hebei, China               | Site investigators                                      |                                                                                            |
| Liping                            | Chen       |                       | MD               | Jiangxi Provincial Children's Hospital                                                                                       | Nanchang, Jiangxi, China                 | Site investigators                                      |                                                                                            |
| Liyang                            | Zhang      |                       | MD               | Fuzhou Children's Hospital of Fujian Province                                                                                | Fuzhou, Fujian, China                    | Site investigators                                      |                                                                                            |
| Hongxia                           | Song       |                       | MD               | First Affiliated Hospital of Xi'an Jiao Tong University                                                                      | Xi'an, Shaanxi, China                    | Site investigators                                      |                                                                                            |
| Zhaoqing                          | Yin        |                       | MD               | Dehong people's Hospital of Yunnan Province                                                                                  | Dehong, Yunnan, China                    | Site investigators                                      |                                                                                            |
| Huiwen                            | Huang      |                       | MD               | Zhuhai Center for Maternal and Child Health Care                                                                             | Zhuhai, Hainan, China                    | Site investigators                                      |                                                                                            |
| Jie                               | Yang       |                       | MD               | Guangdong Women and Children's Hospital                                                                                      | Guangzhou, Guangdong, China              | Site investigators                                      |                                                                                            |
| Dong                              | Li         |                       | MD               | Dalian Municipal Women and Children's Medical Center                                                                         | Dalian, Shandong, China                  | Site investigators                                      |                                                                                            |
| Guofang                           | Ding       |                       | MD               | Peking Union Medical College Hospital                                                                                        | Beijing, Beijing, China                  | Site investigators                                      |                                                                                            |
| Jimei                             | Wang       |                       | MD               | Obstetrics & Gynecology Hospital of Fudan University                                                                         | Shanghai, Shanghai, China                | Site investigators                                      |                                                                                            |
| Qianshen                          | Zhang      |                       | MD               | Shenzhen Hospital of Hongkong University                                                                                     | Shenzhen, Guangdong, China               | Site investigators                                      |                                                                                            |
